# Supplementary material for: Information retrieval for biomedical datasets: the 2016 bioCADDIE dataset retrieval challenge
Source: Oxford University Press journal article supplement (doi:10.1093/database/bax068), 2017-01-01
Supplement: bax068_Supp_results.xlsx [file bax068_Supp_results.xlsx]

## Sheet: Full Results
Group	Submission	infAP	infNDCG	NDCG@10	P@10 (+partial)	P@10 (-partial)
UCSD	submit_armyofucsdgrads-1.txt	0.2542	0.4498	0.4697	0.6067	0.266667
UCSD	submit_armyofucsdgrads-2.txt	0.2901	0.4624	0.3893	0.5067	0.22
UCSD	submit_armyofucsdgrads-3.txt	0.1468	0.5132	0.5303	0.7133	0.24
UCSD	submit_armyofucsdgrads-4.txt	0.1688	0.3704	0.1695	0.24	0.12
UCSD	submit_armyofucsdgrads-5.txt	0.3169	0.4881	0.5877	0.76	0.333333
BioMelb	biomelb_1_1.txt	0.202	0.3657	0.52	0.6733	0.206667
BioMelb	biomelb_2_0.txt	0.1985	0.3664	0.5129	0.6867	0.2
BioMelb	biomelb_3_0.txt	0.1815	0.3843	0.5298	0.7067	0.2
BioMelb	biomelb_4_0.txt	0.2568	0.4017	0.5366	0.7	0.273333
BioMelb	biomelb_5.txt	0.2436	0.3838	0.6325	0.7733	0.333333
Elsevier	elsevier1.txt	0.2789	0.4292	0.5271	0.7	0.266667
Elsevier	elsevier2.txt	0.2963	0.3925	0.5242	0.7067	0.266667
Elsevier	elsevier3.txt	0.281	0.4219	0.5514	0.7133	0.366667
Elsevier	elsevier4.txt	0.3049	0.4368	0.6861	0.8267	0.426667
Elsevier	elsevier5.txt	0.3283	0.4235	0.6011	0.7133	0.34
Emory	emory-1.txt	0.2314	0.3985	0.4761	0.6267	0.206667
Emory	emory-2.txt	0.2278	0.4011	0.4891	0.6	0.233333
Emory	emory-3.txt	0.2471	0.4241	0.5296	0.6933	0.22
Emory	emory-4.txt	0.2818	0.4173	0.5538	0.72	0.266667
HiTSZ-ICRC	hitsz-a-nn1.txt	0.0998	0.3	0.2043	0.2933	0.0533333
HiTSZ-ICRC	hitsz-a-nn2.txt	0.0683	0.2539	0.0991	0.1467	0.0333333
HiTSZ-ICRC	hitsz-all.txt	0.1957	0.371	0.5265	0.6467	0.28
HiTSZ-ICRC	hitsz-d-nn2.txt	0.1185	0.281	0.1512	0.2333	0.0866667
HiTSZ-ICRC	hitsz-des.txt	0.2576	0.385	0.5472	0.7	0.28
IAII_PUT	biocaddiedphresults.txt	0.0876	0.358	0.4265	0.5333	0.16
Mayo	mayorun1_1.txt	0.1393	0.3485	0.5735	0.7267	0.26
Mayo	mayorun2_1.txt	0.1424	0.3516	0.5726	0.7467	0.253333
Mayo	mayorun3_1.txt	0.1077	0.3006	0.4406	0.5333	0.226667
Mayo	mayorun4_0.txt	0.1423	0.3253	0.4453	0.54	0.233333
Mayo	mayorun5_0.txt	0.1628	0.3933	0.5243	0.6667	0.26
OHSU	OHSU-1k-1.txt	0.3193	0.3965	0.6006	0.7467	0.333333
OHSU	OHSU-1k-2.txt	0.1396	0.4024	0.3953	0.48	0.193333
OHSU	OHSU-1k-3.txt	0.1921	0.4405	0.5345	0.6533	0.28
OHSU	OHSU-1k-4.txt	0.2862	0.4454	0.6122	0.76	0.333333
OHSU	OHSU-1k-5.txt	0.083	0.3156	0.2531	0.34	0.113333
SIBTex	sibtex-1.txt	0.3006	0.3898	0.5736	0.7067	0.32
SIBTex	sibtex-2.txt	0.2997	0.3864	0.5726	0.7067	0.326667
SIBTex	sibtex-3.txt	0.3008	0.3875	0.5718	0.7067	0.326667
SIBTex	sibtex-4_0.txt	0.3458	0.4258	0.5237	0.66	0.326667
SIBTex	sibtex-5_0.txt	0.3664	0.4188	0.6271	0.7533	0.346667
UIUC GSIS	prior2-pubmed.official.krovetz.10-25-0.75.txt	0.3054	0.4207	0.4877	0.64	0.266667
UIUC GSIS	prior2-rm3-10-25-0.75.krovetz-all.txt	0.2246	0.3877	0.4724	0.5733	0.233333
UIUC GSIS	pubmed.official.krovetz.10-25-0.75.txt	0.304	0.4185	0.4659	0.6133	0.26
UIUC GSIS	rm3-10-25-0.75.krovetz-all.txt	0.2569	0.3959	0.4675	0.58	0.233333
UIUC GSIS	sdm-0.75-0.1-0.15.krovetz.txt	0.3228	0.4502	0.5569	0.7133	0.286667

## Sheet: Best infNDCG
Group	Submission	infAP	infNDCG	NDCG@10	P@10 (+partial)	P@10 (-partial)
UCSD	submit_armyofucsdgrads-3.txt	0.1468	0.5132	0.5303	0.7133	0.24
UIUC GSIS	sdm-0.75-0.1-0.15.krovetz.txt	0.3228	0.4502	0.5569	0.7133	0.286667
OHSU	OHSU-1k-4.txt	0.2862	0.4454	0.6122	0.76	0.333333
Elsevier	elsevier4.txt	0.3049	0.4368	0.6861	0.8267	0.426667
SIBTex	sibtex-4_0.txt	0.3458	0.4258	0.5237	0.66	0.326667
Emory	emory-3.txt	0.2471	0.4241	0.5296	0.6933	0.22
BioMelb	biomelb_4_0.txt	0.2568	0.4017	0.5366	0.7	0.273333
Mayo	mayorun5_0.txt	0.1628	0.3933	0.5243	0.6667	0.26
HiTSZ-ICRC	hitsz-des.txt	0.2576	0.385	0.5472	0.7	0.28
IAII_PUT	biocaddiedphresults.txt	0.0876	0.358	0.4265	0.5333	0.16

## Sheet: Best P@10
Group	Submission	infAP	infNDCG	NDCG@10	P@10 (+partial)	P@10 (-partial)
Elsevier	elsevier4.txt	0.3049	0.4368	0.6861	0.8267	0.426667
BioMelb	biomelb_5.txt	0.2436	0.3838	0.6325	0.7733	0.333333
UCSD	submit_armyofucsdgrads-5.txt	0.3169	0.4881	0.5877	0.76	0.333333
OHSU	OHSU-1k-4.txt	0.2862	0.4454	0.6122	0.76	0.333333
SIBTex	sibtex-5_0.txt	0.3664	0.4188	0.6271	0.7533	0.346667
Mayo	mayorun2_1.txt	0.1424	0.3516	0.5726	0.7467	0.253333
Emory	emory-4.txt	0.2818	0.4173	0.5538	0.72	0.266667
UIUC GSIS	sdm-0.75-0.1-0.15.krovetz.txt	0.3228	0.4502	0.5569	0.7133	0.286667
HiTSZ-ICRC	hitsz-des.txt	0.2576	0.385	0.5472	0.7	0.28
IAII_PUT	biocaddiedphresults.txt	0.0876	0.358	0.4265	0.5333	0.16
